# Supplementary material
Source: publisher site journal article supplement (https://www.dovepress.com/article/438164)
Supplement: Supplementary file 1 [file get_supplementary_file.php]

**Supplementary Table 1** Synergistic Bacteria‑Mediated Anti-cancer Treatments in Pre-clinical Studies

| **Bacteria or Derivates** | **Field** | **Drugs** | **Cancer Cell Lines and subjects for experiments** | **Connection** | **Key Results** | **Published Article** |
| --- | --- | --- | --- | --- | --- | --- |
| EcN | Chemotherapy | Doxorubicin | Mouse 4T1 breast cancer cell  Mice | Acid-labile linkers of cisaconitic anhydride | ﻿﻿EcN-ca-Dox has maintained the bacterial motion profiles of over 9 μm/s and cell viability of over 70%.  ﻿After 3 h and 3 days of intravenous injection of EcN-ca-Dox, DOX accumulations in tumors are determined as 12.9% and 6.4% of the injected doses per gram of tissue, respectively.  ﻿The EcN-ca-Dox treatment improves the antitumor efficacy with respect to the tumor growth inhibition, prolongation of animal survivals, and apoptosis induction of tumor cells and after antimicrobial treatment, EcN has been cleaned off. | 2017, Journal of Controlled Release174 |
| S. Typhimurium derived-minicells | Chemotherapy | Doxorubicin | U87, BCD-1 and BCD-8;  Spontaneous pet dogs with late-stage brain cancers | EGFR targeted | ﻿Targeted, doxorubicin-loaded minicells (﻿EGFRminicellsDox) rapidly localized to the core of brain tumors.  ﻿Complete resolution or marked tumor regression (>90% reduction in tumor volume) were observed in 23.53% of the cohort, with lasting antitumor responses characterized by remission in 3 dogs for more than 2 years. | 2016, Plos One140 |
| EcN-derived minicells | Chemotherapy | Doxorubicin | Mouse 4T1 breast cancer cell and human MCF-7 cancer cell | pH (low) insertion peptide (pHLIP) | ﻿The pHLIP-mosaic minicells successfully invaded the necrotic ad hypoxic regions of orthotopic breast cancers where free chemotherapeutic drugs could never get to because of vascular insufficiency and high interstitial fluid pressure.  A significant regression of an orthotopic breast tumour in a mouse model was observed. | 2018, Theranostics141 |
| ﻿Attenuated Klebsiella pneumonia-derived OMV | Chemotherapy | Doxorubicin | A549 NSCLC; nude mice model |  | ﻿In A549 tumor-bearing BALB/c nude mice, DOX-OMV presented a substantial tumor growth inhibition with favorable tolerability and pharmacokinetic profile, and TUNEL assay and H&E staining displayed extensive apoptotic cells and necrosis in tumor tissues.  OMV`s appropriate immunogenicity enabled the recruitment of macrophages in tumor microenvironment which might synergize with their cargo DOX in vivo. | 2020, Acta PharAmaceutica Sinica B172 |
| EcN | Chemotherapy | Tum-5 | B16F10 Melanoma |  | ﻿EcN could specifically colonize the tumor, and B16 melanoma tumor growth was remarkably restrained by EcN (Tum- 5) in mice bearing B16 melanoma tumor; ﻿  The expression of endothelial marker platelet endothelial cell adhesion molecule-1 (PECAM-1/CD31) by immunofluorescence was relatively reduced in tumor sections of EcN (Tum-5)-treated mice | 2017, Oncotarget121 |
| Salmonella derived OMV | Chemotherapy | Taxol | ﻿Human colorectal carcinoma (HTC116), breast cancer (MCF-7) and hepatocellular carcinoma (HepG2) cell lines;  ﻿Ehrlich solid carcinoma-bearing mice model |  | ﻿ST-OMVs significantly decreased tumor volume, significantly increased tumor growth inhibition rate, upregulated the immunohistochemical expression of caspase-3, Beclin-1, and CD49b;  ST-OMVs promoted apoptosis, decreased tumor invasion and mitotic activities;  ST-OMVs showed a remarkable cytotoxic activity in various investigated in vitro cancer cell lines. | 2021, Experimental Cell Research212 |
| L. Lactis NZ9000 | Gene Therapy | Expression of human soluble TRAIL | HCT116, SW480, colon cancer;  NOD-SCID mouse model of human colorectal cancer | / | The modified L. lactis bacteria were able to secrete biologically active human soluable TRAIL (L. lactis(hsTRAIL+)), which was further strengthened by metformin (MetF).  A significant reduction of the tumor growth by itratumor injection of L. lactis (hsTRAIL+) bacteria producing hsTRAIL. | 2021, Cancers214 |
| VNP20009 | Gene Therapy | Expression of AIF | ﻿B16F10 cell, melanoma | the eukaryotic expression Ab vector | ﻿AIF expressed by the ﻿VNP20009-AbVec-Igκ-AIF (V-A-AIF) strain significantly enhanced the apoptosis of B16F10 cells in vitro, seen as remarkable decrease of tumor volume, formation of larger necrotic areas, and prolongation of the lifespan in a melanoma-bearing mouse model;  ﻿The colonization of the V-A-AIF strain and the massive expression of AIF in tumors significantly promoted apoptosis of tumor cells by upregulating the expression ratio of Bcl-2-associated X protein/B cell lymphoma-2 (Bax/Bcl-2), suppressed the inflammatory response by downregulating toll-like receptor-4/ nuclear factor kappa-B (TLR-4/NFκB) signaling pathway. | 2020，Applied Microbiology and Biotechnology185 |
| E. coli strain, BW25133 | Gene Therapy | Expression of cardiac peptides | MCF-7 breast cancer cell | GFP signaling protein | ﻿Intravenously injected bacteria could selectively accumulate in tumor site and temporally express GFP and cardiac peptides in response to hypoxia, enhancing survival rate of tumor bearing mice, suppressing tumor growth rate and expression of MMP-9, VEGFR2, CD31 and Ki67 biomarkers.  It could also significantly reduce concentration of ﻿IL-1β, IL-6, GC-SF, IL-12 and TNF-α proinflammatory cytokines while increasing those of IL-10, IL-17A and INF-γ. | 2021, Journal of Biological Engineering187 |
| ﻿Magnetospirillum gryphiswaldense MSR-1 derived particles | Gene Therapy | Expression of cecropin B (ABPs) and apoptin (VP3) | Human hepatocellular carcinoma (HepG2);  Nude mouse tumor models |  | ﻿BMPs significantly improved the efficiency of gene transfection, which led to stronger apoptosis ﻿and growth inhibition of HepG2 cells. ﻿  BMP-pVAX1-VA strikingly inhibited tumor growth in nude mouse tumor models and increased the tumor-infiltrating lymphocytes considerably without apparent cytotoxicity | 2018，Biochemical and Biophysical Research Communications160 |
| Salmonella Typhimurium SL3261 | Gene Therapy | Expression of Bax BH3 peptide | ﻿The Ramos cell line (Burkitt`s lymphoma);  ﻿ |  | we expressed and released the cell-permeable Bax BH3 peptide from the surface of Salmonella enterica serovar Typhimurium SL3261 through the MisL autotransporter system.  The intravenous administration of this recombinant Salmonella elicited antitumor activity and extended survival in a xenograft NHL murine model, which was mediated by apoptosis and an inflammatory response. | 2019, Frontiers in Immunology186 |
| ﻿Magnetospirillum magneticum AMB-1 derived Magnetosome | / | / | U87 glioma cell lines;  Glioblastoma-bearing mice | RGD (bind to αnβ3 integrins) for internalization | ﻿After injection at the tail vein of glioblastoma-bearing mice, we evidence in the first 2 h the rapid accumulation of both unlabeled and functionalized magnetosomes inside the tumor by Enhanced Permeability and Retention effects.  24 h after the injection, a specific enhancement of the tumor contrast is observed on MR images only for RGD-labeled magnetosomes. | 2017, Biomaterials215 |
| ﻿Magnetospirillum gryphiswaldense derived Magnetosome | / | / | MDA-MB-231, mouse breast cancer model | Anti-EGFR antibodies | ﻿Compared with HSA-coated iron oxide nanoparticles, magnetosomes were bound with higher rate and more cytotoxic to breast cancer cells.  ﻿Magnetosome demonstrated higher distribution in tumor tissue than HSA-coated iron oxide nanoparticles according to fluorescence microscopy evaluation. | 2018, Applied Biochemistry and Biotechnology157 |
| EcN | Immunotherapy ﻿ | PD-L1 or the CTLA-4 | A20 (B-cell lymphoma) and CT26 (colorectal) murine cancer cells and corresponding mouse models |  | ﻿A single intratumoral injection of this engineered system demonstrated an enhanced therapeutic response compared to analogous clinically relevant antibodies, resulting in tumor regression in syngeneic mouse models.  ﻿A relative increase in activated T cells, an abscopal effect, and corresponding increases in systemic T cell memory populations was observed in mice treated with probiotically-delivered checkpoint inhibitors | 2020, Science Translational Medicine210 |
| Megnetosomes | Hyperthemia treatment | Magnetic hyperthemia treatment | U87-Luc glioma, in vivo mouse model | / | ﻿Mice bearing intracranial U87-Luc glioma tumors injected with 13 μg of nanoparticles per mm3 of tumor followed by 12 to 15 of 30 min alternating magnetic field applications displayed full tumor disappearance in 40% of mice using magnetosomes. This phenomenon was observed when magnetosomes occupied only 10% of the whole tumor volume. | 2017，Journal of Controlled Release158 |
| Shewanella Oneidensis MR-1 | ﻿Photo-thermal therapy (PTT) |  | CT 26 cells, CT26 mouse model | / | Methylene blue (MB)-encapsulated Zeolitic imidazole frameworks-90 (ZIF-90) can selectively release MB at mitochondria and cause mitochondrial dysfunction by producing singlet oxygen under illumination.  Mitochondrial dysfunction further contributes to ATP synthesis inhibition and dramatic heat shock proteins down-regulated expression.  Significant tumor ablation was observed in both 660 nm light and 808 nm laser treatment group (660 + 808) using ZIF-90/MB with severe tumor cell damage detected by H&E staining. | 2020, Advanced Functional Materials181 |
| VNP20009 | PTT | Polydopamine (pDA) | B16-F10 melanoma cells and B16-10 mouse model |  | VNP20009 was coated with polydopamine via oxidation and self-polymerization, which was then injected into tumor-bearing mice via the tail vein.  Polydopamine-coated VNP20009 targeted hypoxic areas of the solid tumors, and near-infrared laser (808nm wavelength) irradiation of the tumors induced heating due to polydopamine.  This combined approach eliminated the tumors without relapse or metastasis with only one injection and laser irradiation | 2018, ACS Nano179 |
| Salmonella derived OMVs | PTT |  | **﻿**murine colorectal cancer cell line CT26 and murine breast cancer cell line 4T1; nude mouse model; |  | ﻿It was found that single i. v. injection of OMVs could activate the immune system by boosting the secretion levels of anti-tumor related cytokines;  A single low dose of i. v. injected OMVs derived from Gram-negative bacteria would result in extravasation of RBCs inside the tumor due to the effect of lipopolysaccharide on the OMVs;  The tumors on OMV-treated mice showed obvious darkened color and then, under irradiation by the NIR laser, the tumor temperature would show rapid increase, resulting in effective elimination of those tumors as demonstrated in two types of tumor models. | 2021，Biomaterials182 |
| E. Coli | ﻿photo-controlled bacterial metabolite therapy (PMT). |  | 4T1 cancer cell;  4T1 and CT26 mice model |  | ﻿Carbon Nitride (C3N4) is combined with E. coli carrying nitric oxide (NO) generation enzymes and under light irradiation, photoelectrons produced by C3N4 can be transferred to E. coli to promote the enzymatic reduction of endogenous NO3- to cytotoxic NO with 37-fold increase.  Apoptosis induced by NO was the main cause of death for 4T1 cells25.  ﻿In a mouse model, C3N4 loaded bacteria are perfectly accumulated throughout the tumor and the PMT treatment results in around 80% inhibition of tumor growth;  ﻿Results obtained from proteomics also suggest that immune response may involve in this therapy, and PMT strategy may lead to useful actuation in cancer immunotherapy | 2018, Nature Communications183 |
| ﻿Bifidobacterium longum (B. longum, ATCC-15707) | HIFU |  | ﻿MDA-MB-231 breast cancer cells | PFH(perfluorohexane)/PLGA NPs | ﻿Low-boiling point perfluorohexane (PFH) liquid was wrapped in the core of PLGA NPs (PFH/PLGA NPs) in order to increase the deposition of energy by affecting the acoustic environment of the tumor and destroy cells after liquid-gas phase transition during High Intensity Focused Ultrasound (HIFU) irradiation  PFH/PLGA-B. longum could specifically target into the tumor, providing stronger imaging, longer retention time and more effective tumor therapy with good biosafety and biocompatibility. | 2019, Biochemical and Biophysical Research Communications184 |
| Salmonella derived OMV | Combination of immunotherapy and chemotherapy | Tigafur | ﻿B16F10 cells，B16F10 metastatic mouse model | PEG-RGD | ﻿The functionalized OMV-DSPE-PEG-RGD (OR)-coated F127 nanomicelles (ORFTs), as expected, could modulate the tumor immunity and promote the combination therapy between OMVs and immunomodulatory drugs.  ﻿The therapeutic effect mediated by functionalized OMV-coated, tegafur-loaded micelles showed substantial improvement in terms of tumor inhibitory rate and survival extension.  It is ﻿demonstrated that tegafur could be readily transformed into 5-FU to exert its chemotherapeutic role to kill cancer cells, and the transformation of tegafur into 5-FU greatly enhanced the anticancer immunity of OMVs by sensitizing melanoma cells to CTLs at the tumor tissue.  ﻿The presence of tegafur also contributed to the remarkable inhibition of pulmonary metastasis in combination with OMVs | 2020, Nano Letters171 |
| E Coli BL21-derived OMV | Chemotherapy and PTT | FA and ICGs | 4T1 cell and Ct26 mice model | CaP encapsulation to form the platform; CaP-FA and Cap-ICGs | ﻿Calcium phosphate (CaP) shells were employed to cover the surface of OMVs, which enables potent OMV-based TME reprograming without side effects.  The pH-sensitive CaP shells facilitate the neutralization of acidic TME, leading to highly beneficial M2-to-M1 polarization of macrophages for improved antitumor effect.  The outer shells can be integrated with functional components like folic acid or photosensitizer agents, which facilitates the use of the OMV-based platform in combination therapies for a synergic therapeutic effect. | 2020, Advanced Materials178 |
| E Coli DH5 α-derived OMVs | Target Therapy |  | TC-1 cancer model;  B16F10 melanoma model; | BFGF | ﻿It was ﻿proved the basic fibroblast growth factor (BFGF)-loaded OMVs could induce the host to produce persistent anti-BFGF autoantibodies in mice after only 3 immunizations to antagonize BFGF functions.  The effects included multiple tumor suppression functions, including inhibition of tumor angiogenesis, induction of tumor cell apoptosis, reversal of tumor immune barriers, and promotion of tumor-specific cytotoxic T lymphocytes (CTLs), eventually causing tumor regression.  BFGF-OMVs were used as vaccines to successfully induce the body to produce persistent anti-BFGF autoantibodies to inhibit tumor growth and metastasis | 2020, ﻿Acta Biomaterialia188 |
| E coli BL21 derived DMV | Chemotherapy and target therapy | Doxorubicin | B16-F10 melanoma mouse model | RGD | ﻿﻿In vitro and in vivo experiments showed that DMVs can target neutrophils and monocytes that mediated the transport of DMVs across ﻿blood vessel barriers, resulting in enhanced delivery of therapeutics to tumor microenvironments (TMEs);  In the B16-F10 melanoma mouse model, we showed that DOX-RGD-DMVs significantly inhibited the tumor growth compared to several controls | 2021, Theranostics213 |
| E.Coli derived Protoplast-derived Nanovesicles (PDNV) | Chemotherapy and gene therapy | Doxorubicin and Idarubicin;  Expression of EGF | ﻿Human lung carcinoma A459 cells; A459 mice model | EGF, Cy7 | ﻿Chemotherapeutics-loaded in the nanovesicles induce dose-dependent cytotoxicity in tumor cells in vitro. Moreover, specific trafficking of drug-loaded nanovesicles to the tumor tissue and efficient prevention of tumor growth in tumor xenografted mice are shown;  ﻿This tumor growth suppression of protoplast nanovesicles has shown to reduce the chemotherapeutics-induced adverse effects after systemic administration to mice | 2017, Biomaterials211 |
| E Coli K12-derived OMV | ﻿Multi-spectral optoacoustic tomography (MSOT) and Gene therapy | Expression of Rhizobium Etliyrosinase | ﻿subcutaneous 4T1 mouse model |  | ﻿The tumour surface temperature in the laser-exposed area in animals treated intratumourally with OMVMel reached as high as 56 °C;  ﻿OMVMel builds up intense heat from the absorbed laser energy and mediates photothermal effects both in vitro and in vivo;  ﻿Using multispectral optoacoustic tomography, we noninvasively monitor the spatio-temporal, tumour-associated OMVMel distribution in vivo. | 2019, Nature Communications180 |
